# Supplementary material
Source: PubMed Central journal article supplement (PMC4958164)
Supplement: AAC.03008-15_zac008165397so1.pdf [file AAC.03008-15_zac008165397so1.pdf]

Supplement Table 1 Comparison of risk factors of 4<sup>th</sup> month sputum culture conversion and treatment outcome between patients with isolates that had MIC above and below the CART analysis-derived clinical breakpoints

| Parameter                               | 4 <sup>th</sup> month sputum culture conversion |                           | Treatment outcome |                |                |                |                |                |                |                           |
|-----------------------------------------|-------------------------------------------------|---------------------------|-------------------|----------------|----------------|----------------|----------------|----------------|----------------|---------------------------|
|                                         | PZA MIC CBPs                                    |                           | OFX MIC CBPs      |                | CAP MIC CBPs   |                | KAN MIC CBPs   |                | PZA MIC CBPs   |                           |
|                                         | ≤ 18.75                                         | > 18.75                   | ≤ 3               | > 3            | ≤ 0.75         | > 0.75         | ≤ 12           | > 12           | ≤ 37.5         | > 37.5                    |
|                                         | (n=82)                                          | (n=125)                   | (n=101)           | (n=83)         | (n=57)         | (n=128)        | (n=140)        | (n=45)         | (n=109)        | (n=76)                    |
| <i>Sociodemographic characteristics</i> |                                                 |                           |                   |                |                |                |                |                |                |                           |
| Age, mean, y (SD)                       | 50.5<br>(18.8)                                  | 49.8<br>(15.6)            | 48.2<br>(15.4)    | 50.7<br>(18.1) | 51.8<br>(16.3) | 48.1<br>(16.9) | 48.8<br>(16.6) | 50.4<br>(17.4) | 49.4<br>(17.4) | 48.9<br>(16.0)            |
| Female sex                              | 33<br>(40.2)                                    | 36<br>(28.8)              | 35<br>(34.7)      | 26<br>(31.3)   | 16<br>(28.1)   | 45<br>(35.2)   | 49<br>(35.0)   | 12<br>(26.7)   | 42<br>(38.5)   | 19<br>(25.0)              |
| Prior treated TB                        | 18<br>(22.0)                                    | 54<br>(43.2) <sup>c</sup> | 35<br>(34.7)      | 35<br>(42.2)   | 17<br>(29.8)   | 54<br>(42.2)   | 54<br>(38.6)   | 17<br>(37.8)   | 27<br>(24.8)   | 44<br>(57.9) <sup>b</sup> |
| Baseline Pre/XDR-TB                     | 29                                              | 62                        | 31                | 49             | 16             | 65             | 49             | 32             | 38             | 43                        |

|                                                |        |                     |        |                     |        |                     |        |                     |        |                     |
|------------------------------------------------|--------|---------------------|--------|---------------------|--------|---------------------|--------|---------------------|--------|---------------------|
|                                                | (35.4) | (49.6) <sup>a</sup> | (30.7) | (59.0) <sup>b</sup> | (28.1) | (50.8) <sup>c</sup> | (35.0) | (71.1) <sup>b</sup> | (34.9) | (56.6) <sup>c</sup> |
| Beijing genotype                               | 59     | 101                 | 76     | 69                  | 46     | 100                 | 107    | 39                  | 81     | 65                  |
|                                                | (72.0) | (80.8)              | (75.2) | (83.1)              | (80.7) | (78.1)              | (76.4) | (86.7)              | (74.3) | (85.5)              |
| Work out                                       | 11     | 16                  | 18     | 8                   | 10     | 16                  | 21     | 5                   | 18     | 8                   |
|                                                | (13.4) | (12.8)              | (17.8) | (9.6)               | (17.5) | (12.5)              | (15.0) | (11.1)              | (16.5) | (10.5)              |
| <i>Comorbidities</i>                           |        |                     |        |                     |        |                     |        |                     |        |                     |
| Diabetes mellitus                              | 5      | 18                  | 7      | 12                  | 4      | 15                  | 16     | 3                   | 8      | 11                  |
|                                                | (6.1)  | (14.4)              | (6.9)  | (14.5)              | (7.0)  | (11.7)              | (11.4) | (6.7)               | (7.3)  | (14.5)              |
| Cardiovascular disease                         | 14     | 19                  | 18     | 12                  | 11     | 19                  | 25     | 5                   | 18     | 12                  |
|                                                | (17.1) | (15.2)              | (17.8) | (14.5)              | (19.3) | (14.8)              | (17.9) | (11.1)              | (16.5) | (15.8)              |
| <i>Clinical indicators of disease severity</i> |        |                     |        |                     |        |                     |        |                     |        |                     |
| Cavity                                         | 16     | 40                  | 26     | 24                  | 14     | 36                  | 34     | 16                  | 23     | 27                  |
|                                                | (19.5) | (32.0) <sup>a</sup> | (25.7) | (28.9)              | (24.6) | (28.1)              | (24.3) | (35.6)              | (21.1) | (35.5) <sup>a</sup> |
| Severe pulmonary disease on                    | 13     | 22                  | 20     | 14                  | 15     | 20                  | 26     | 9                   | 15     | 20                  |
| CXR                                            | (15.9) | (17.6)              | (19.8) | (16.9)              | (26.3) | (15.6)              | (18.6) | (20.0)              | (13.8) | (26.3) <sup>a</sup> |
| Extrapulmonary disease                         | 14     | 22                  | 12     | 23                  | 12     | 23                  | 27     | 8                   | 17     | 18                  |

---

(17.1) (17.6) (11.9) (27.7)<sup>c</sup> (21.1) (18.0) (19.3) (17.8) (15.6) (23.7)

---

Data are presented as No. (%) unless otherwise specified.

<sup>a</sup> P ≤ 0.05

<sup>b</sup> P ≤ 0.001

<sup>c</sup> P ≤ 0.01

Note: CBPs: clinical breakpoints; CV: cutoff value
